# Supplementary material for: The Impact of Geographic and Social Proximity on Physicians: Evidence from the Adoption of an Online Health Community
Source: Atypon-hosted journal article supplement (doi:10.1287/isre.2020.0663), 2024-06-14
Supplement: isre.2020.0663.sm1.pdf [file isre.2020.0663.sm1.pdf]

**The Impact of Geographic and Social Proximity on Physicians:  
Evidence from the Adoption of an Online Health Community**

**Appendix**

**Table A1. Characteristics to Construct Social Proximity Matrix**

|               | Hospital class | Per capital GDP | Per capital physicians | % of mobile phone user | % of students at each education level | Per capital medical institutions | % of 65 years old or older | Per capital beds | % of telephone user |
|---------------|----------------|-----------------|------------------------|------------------------|---------------------------------------|----------------------------------|----------------------------|------------------|---------------------|
| Base          | ✓              | ✓               | ✓                      | ✓                      | ✓                                     | ✓                                | ✓                          | ✓                | ✓                   |
| Alternative 1 | ✓              | ✓               | ✓                      | ✓                      | ✓                                     | ✓                                | ✓                          | ✓                |                     |
| Alternative 2 | ✓              | ✓               | ✓                      | ✓                      | ✓                                     | ✓                                | ✓                          |                  |                     |

**Table A2. Descriptive Statistics**

| Variables                                     | Obs       | Mean   | Std.Dev. | Min     | Max     |
|-----------------------------------------------|-----------|--------|----------|---------|---------|
| Geographic proximity influence (GPI)          | 1,532,569 | 0.0100 | 1.0030   | -1.0735 | 4.1761  |
| Social proximity influence (SPI)              | 1,532,569 | 0.0125 | 1.0012   | -1.2810 | 4.7251  |
| Competition (COMPT)                           | 1,532,569 | 0.0059 | 1.0047   | -0.7188 | 5.7798  |
| Local adoption rate                           | 1,532,569 | 0.1619 | 0.1330   | 0       | 0.9167  |
| Internet penetration rate                     | 1,532,569 | 0.2400 | 0.1494   | 0       | 0.4816  |
| Weather[# of rainy days/# of days in a month] | 1,532,569 | 0.3740 | 0.1572   | 0       | 1       |
| Local Marketing Efforts (LocalMarkEff)        | 1,532,569 | 8.7891 | 1.2855   | -1.6472 | 10.6980 |
| Log(Number of new patients+1)                 | 1,532,569 | 7.2959 | 3.2345   | 0       | 11.0466 |
| Log(Number of votes+1)                        | 1,532,569 | 0.0002 | 0.0121   | 0       | 1.6094  |

**Table A3. Results of Eq. 1 across Different Specifications**

| Variables     | Add quality signals | Alt. SPI measure 1 | Alt. SPI measure 2 | Redefined high title | Alt. Competition measure |
|---------------|---------------------|--------------------|--------------------|----------------------|--------------------------|
| GPI           | 0.437* (0.184)      | 0.422* (0.179)     | 0.413* (0.178)     | 0.688** (0.240)      | 0.432* (0.188)           |
| SPI           | -0.335*** (0.058)   | -0.340*** (0.060)  | -0.325*** (0.056)  | -0.387*** (0.069)    | -0.342*** (0.058)        |
| COMPT         | -0.168*** (0.044)   | -0.161*** (0.043)  | -0.159*** (0.043)  | -0.240*** (0.059)    | -0.179*** (0.048)        |
| High Title    | 0.634*** (0.030)    | 0.627*** (0.030)   | 0.625*** (0.030)   | 0.739*** (0.042)     | 0.635*** (0.030)         |
| Controls      | Yes                 | Yes                | Yes                | Yes                  | Yes                      |
| Observations  | 1,532,569           | 1,532,569          | 1,532,569          | 898,117              | 1,532,569                |
| Loglikelihood | -16,708             | -16,771            | -16,769            | -9,752               | -16,768                  |

Note: Standard errors in parentheses \*\*\* p<0.001, \*\* p<0.01, \* p<0.05

**Table A4. Results of Eq. 2 across Different Specifications**

| Variables    | Add quality signals | Alt. SPI measure 1 | Alt. SPI measure 2 | Redefined high title | Alt. Competition measure |
|--------------|---------------------|--------------------|--------------------|----------------------|--------------------------|
| GPI          | -0.630** (0.199)    | -0.652*** (0.189)  | -0.690*** (0.189)  | -0.772** (0.258)     | -0.689*** (0.197)        |
| SPI          | -0.311*** (0.055)   | -0.321*** (0.056)  | -0.294*** (0.054)  | -0.355*** (0.067)    | -0.313*** (0.056)        |
| GPI*COMPT    | 0.657*** (0.083)    | 0.672*** (0.084)   | 0.711*** (0.084)   | 0.848*** (0.103)     | 0.690*** (0.085)         |
| SPI*COMPT    | -0.346*** (0.057)   | -0.350*** (0.057)  | -0.375*** (0.056)  | -0.481*** (0.072)    | -0.350*** (0.059)        |
| COMPT        | -0.629*** (0.064)   | -0.635*** (0.063)  | -0.653*** (0.064)  | -0.745*** (0.079)    | -0.676*** (0.064)        |
| High Title   | 0.677*** (0.032)    | 0.672*** (0.032)   | 0.672*** (0.032)   | 0.794*** (0.044)     | 0.686*** (0.032)         |
| Controls     | Yes                 | Yes                | Yes                | Yes                  | Yes                      |
| Observations | 1,532,569           | 1,532,569          | 1,532,569          | 898,117              | 1,532,569                |

Loglikelihood    -16662                      -16723                      -16716                      -9707                      -16716

Note: Standard errors in parentheses \*\*\* p<0.001, \*\* p<0.01, \* p<0.05

**Table A5. Results of Eq. 3 across Different Specifications**

| Variables             | Add quality signals | Alt. SPI measure 1 | Alt. SPI measure 2 | Redefined high title | Alt. Competition measure |
|-----------------------|---------------------|--------------------|--------------------|----------------------|--------------------------|
| GPI                   | -0.282 (0.210)      | -0.310 (0.200)     | -0.337 (0.200)     | -0.568* (0.263)      | -0.296 (0.208)           |
| GPI*High Title        | -0.591*** (0.078)   | -0.596*** (0.080)  | -0.629*** (0.082)  | -0.601*** (0.110)    | -0.634*** (0.081)        |
| GPI*COMPT             | 0.862*** (0.095)    | 0.841*** (0.096)   | 0.829*** (0.096)   | 0.809*** (0.104)     | 0.897*** (0.097)         |
| GPI*COMPT* High Title | -0.353*** (0.103)   | -0.301** (0.104)   | -0.218* (0.105)    | -0.104 (0.153)       | -0.355*** (0.105)        |
| SPI                   | -0.465*** (0.064)   | -0.479*** (0.066)  | -0.493*** (0.066)  | -0.460*** (0.072)    | -0.483*** (0.065)        |
| SPI*High Title        | 0.372*** (0.057)    | 0.366*** (0.060)   | 0.429*** (0.063)   | 0.625*** (0.081)     | 0.391*** (0.058)         |
| SPI*COMPT             | -0.710*** (0.077)   | -0.681*** (0.077)  | -0.650*** (0.076)  | -0.555*** (0.077)    | -0.729*** (0.079)        |
| SPI*COMPT* High Title | 0.613*** (0.098)    | 0.573*** (0.097)   | 0.484*** (0.096)   | 0.353* (0.142)       | 0.630*** (0.100)         |
| COMPT                 | -0.686*** (0.066)   | -0.680*** (0.066)  | -0.682*** (0.066)  | -0.735*** (0.078)    | -0.741*** (0.067)        |
| High Title            | 0.302*** (0.038)    | 0.289*** (0.038)   | 0.282*** (0.039)   | 0.246*** (0.052)     | 0.293*** (0.039)         |
| COMPT*High Title      | 0.044 (0.053)       | 0.018 (0.053)      | -0.008 (0.054)     | 0.061 (0.082)        | 0.066 (0.054)            |
| Controls              | Yes                 | Yes                | Yes                | Yes                  | Yes                      |
| Observations          | 1,532,569           | 1,532,569          | 1,532,569          | 898,117              | 1,532,569                |
| Loglikelihood         | -16254              | -16318             | -16309             | -9359                | -16303                   |

Note: Standard errors in parentheses \*\*\* p<0.001, \*\* p<0.01, \* p<0.05

**Table A6a. Results of Eqs. 1 & 2 with Interactions between LocalMarkEff and Physician Titles**

| Variables                  | Full Sample       |                   | Matched Sample    |                   |
|----------------------------|-------------------|-------------------|-------------------|-------------------|
| GPI                        | 0.023 (0.176)     | -0.688*** (0.176) | -0.006 (0.175)    | -0.681*** (0.173) |
| SPI                        | -0.287*** (0.066) | -0.170** (0.064)  | -0.276*** (0.065) | -0.167** (0.063)  |
| GPI*COMPT                  |                   | 0.704*** (0.083)  |                   | 0.684*** (0.082)  |
| SPI*COMPT                  |                   | -0.382*** (0.058) |                   | -0.378*** (0.057) |
| COMPT                      | -0.067 (0.045)    | -0.628*** (0.059) | -0.057 (0.045)    | -0.587*** (0.058) |
| Chief                      | -0.387 (0.353)    | -0.706 (0.364)    | 17.731 (4,605)    | 18.053 (4,874)    |
| Assoc. Chief               | 1.220*** (0.310)  | 1.042** (0.319)   | 19.426 (4,689)    | 19.951 (4,823)    |
| Attending                  | 0.632* (0.291)    | 0.649* (0.301)    | -1.018 (0.848)    | -1.184 (0.881)    |
| LocalMarkEff *Chief        | 0.106** (0.039)   | 0.146*** (0.040)  | 0.140*** (0.039)  | 0.180*** (0.040)  |
| LocalMarkEff *Assoc. Chief | -0.081* (0.034)   | -0.057 (0.035)    | -0.049 (0.034)    | -0.023 (0.035)    |
| LocalMarkEff *Attending    | -0.085** (0.032)  | -0.087** (0.033)  | -0.064* (0.032)   | -0.064 (0.033)    |
| Controls                   | Yes               | Yes               | Yes               | Yes               |
| Strata FE                  |                   |                   | Yes               | Yes               |
| Observations               | 1,532,569         | 1,532,569         | 1,519,008         | 1,519,008         |
| Loglikelihood              | -16746            | -16696            | -16218            | -16171            |

Note: Standard errors in parentheses \*\*\* p<0.001, \*\* p<0.01, \* p<0.05

**Table A6b. Results of Eq. 3 with Interactions between LocalMarkEff and Physician Titles**

| Variables                                              | Full Sample       |  | Matched Sample    |  |
|--------------------------------------------------------|-------------------|--|-------------------|--|
| Geographic Proximity Influence                         | 0.105 (0.182)     |  | 0.043 (0.181)     |  |
| Social Proximity Influence                             | -0.309*** (0.076) |  | -0.301*** (0.074) |  |
| Geographic Proximity Influence*Competition             | 0.733*** (0.094)  |  | 0.726*** (0.093)  |  |
| Social Proximity Influence*Competition                 | -0.725*** (0.080) |  | -0.712*** (0.079) |  |
| Geographic Proximity Influence* Competition*High Title | -0.053 (0.108)    |  | -0.083 (0.107)    |  |
| Social Proximity Influence*Competition*High Title      | 0.561*** (0.100)  |  | 0.560*** (0.099)  |  |
| Geographic Proximity Influence*High Title              | -1.224*** (0.160) |  | -1.115*** (0.161) |  |
| Social Proximity Influence*High Title                  | 0.349*** (0.060)  |  | 0.344*** (0.059)  |  |
| Competition *High Title                                | -0.274*** (0.060) |  | -0.276*** (0.059) |  |
| Competition                                            | -0.512*** (0.058) |  | -0.476*** (0.058) |  |
| Chief                                                  | -6.467*** (1.030) |  | 13.041 (5,004.6)  |  |

|                                      |           |         |           |           |
|--------------------------------------|-----------|---------|-----------|-----------|
| Assoc. Chief                         | -4.236*** | (0.952) | 15.424    | (4,973.8) |
| Attending                            | 0.451     | (0.291) | -1.324    | (0.871)   |
| Local Marketing Efforts*Chief        | 0.735***  | (0.113) | 0.696***  | (0.111)   |
| Local Marketing Efforts*Assoc. Chief | 0.481***  | (0.104) | 0.445***  | (0.102)   |
| Local Marketing Efforts*Attending    | -0.069*   | (0.032) | -0.055    | (0.032)   |
| Controls                             | Yes       |         | Yes       |           |
| Strata FE                            |           |         | Yes       |           |
| Observations                         | 1,532,569 |         | 1,519,008 |           |
| Loglikelihood                        | -16314    |         | -15790    |           |

Note: Standard errors in parentheses \*\*\* p<0.001, \*\* p<0.01, \* p<0.05

**Table A7a. Results of Eqs. 1 & 2 with Interactions between LocalMarkEff and Hospital Class**

| Variables              | Full Sample |         |           |         | Matched Sample |         |           |         |
|------------------------|-------------|---------|-----------|---------|----------------|---------|-----------|---------|
| GPI                    | 0.119       | (0.170) | -0.571*** | (0.173) | 0.078          | (0.169) | -0.582*** | (0.171) |
| SPI                    | -0.328***   | (0.064) | -0.222*** | (0.061) | -0.316***      | (0.063) | -0.215*** | (0.061) |
| GPI*COMPT              |             |         | 0.647***  | (0.083) |                |         | 0.631***  | (0.082) |
| SPI*COMPT              |             |         | -0.356*** | (0.059) |                |         | -0.352*** | (0.058) |
| COMPT                  | -0.088*     | (0.043) | -0.598*** | (0.059) | -0.074         | (0.043) | -0.559*** | (0.058) |
| LocalMarkEff *Level 3A | 0.321***    | (0.074) | 0.317***  | (0.076) | 0.319***       | (0.073) | 0.315***  | (0.074) |
| LocalMarkEff *Level 3  | 0.181*      | (0.087) | 0.100     | (0.087) | 0.178*         | (0.085) | 0.102     | (0.086) |
| LocalMarkEff *Level 2A | 0.159*      | (0.076) | 0.160*    | (0.078) | 0.162*         | (0.075) | 0.164*    | (0.077) |
| Controls               | Yes         |         | Yes       |         | Yes            |         | Yes       |         |
| Strata FE              |             |         |           |         | Yes            |         | Yes       |         |
| Observations           | 1,532,569   |         | 1,532,569 |         | 1,519,008      |         | 1,519,008 |         |
| Loglikelihood          | -16751      |         | -16703    |         | -16207         |         | -16163    |         |

Note: Standard errors in parentheses \*\*\* p<0.001, \*\* p<0.01, \* p<0.05

**Table A7b. Results of Eq. 3 with Interactions between LocalMarkEff and Hospital Class**

| Variables                                             | Full Sample |         | Matched Sample |         |
|-------------------------------------------------------|-------------|---------|----------------|---------|
| Geographic Proximity Influence                        | -0.217      | (0.183) | -0.251         | (0.182) |
| Social Proximity Influence                            | -0.365***   | (0.070) | -0.354***      | (0.069) |
| Geographic Proximity Influence*Competition            | 0.881***    | (0.097) | 0.872***       | (0.096) |
| Social Proximity Influence*Competition                | -0.748***   | (0.079) | -0.745***      | (0.078) |
| Geographic Proximity Influence*Competition*High Title | -0.375***   | (0.104) | -0.394***      | (0.103) |
| Social Proximity Influence*Competition*High Title     | 0.642***    | (0.099) | 0.656***       | (0.098) |
| Geographic Proximity Influence*High Title             | -0.629***   | (0.079) | -0.600***      | (0.081) |
| Social Proximity Influence*High Title                 | 0.379***    | (0.058) | 0.375***       | (0.057) |
| Competition *High Title                               | 0.068       | (0.053) | 0.049          | (0.054) |
| Competition                                           | -0.674***   | (0.063) | -0.633***      | (0.062) |
| Local Marketing Efforts*Level 3A                      | 0.324***    | (0.075) | 0.321***       | (0.074) |
| Local Marketing Efforts*Level 3                       | 0.100       | (0.087) | 0.099          | (0.085) |
| Local Marketing Efforts*Level 2A                      | 0.162*      | (0.078) | 0.167*         | (0.076) |
| Controls                                              | Yes         |         | Yes            |         |
| Strata FE                                             |             |         | Yes            |         |
| Observations                                          | 1,532,569   |         | 1,519,008      |         |
| Loglikelihood                                         | -16282      |         | -15740         |         |

Note: Standard errors in parentheses \*\*\* p<0.001, \*\* p<0.01, \* p<0.05

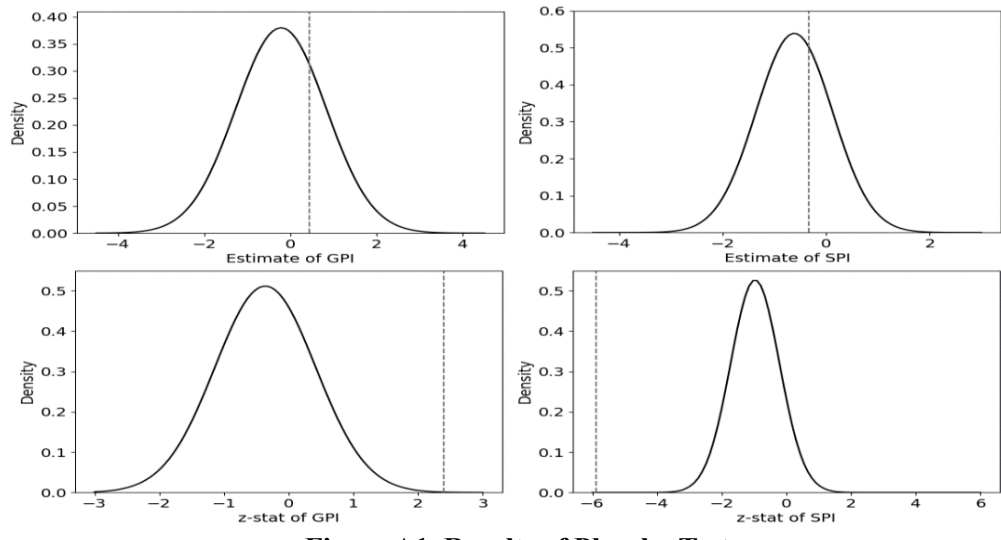

**Figure A1. Results of Placebo Test**
